# Supplementary material for: Long-life, high-efficiency lithium/sulfur batteries from sulfurized carbon nanotube cathodes
Source: Royal Society of Chemistry journal article supplement (doi:10.1039/c5ta00286a), 2015-01-01
Supplement: c5ta00286a1.pdf [file c5ta00286a1.pdf]

## Supplemental Information

### **Long-Life, High-Efficiency Lithium/Sulfur Batteries from Sulfurized Carbon Nanotube Cathodes**

*Jianhua Yan<sup>1,2</sup>, Xingbo Liu<sup>2</sup>, Xianfeng Wang<sup>1</sup> and Bingyun Li<sup>1,\*</sup>*

*<sup>1</sup> Biomaterials, Bioengineering & Nanotechnology Laboratory, Department of Orthopaedics, West Virginia University, Morgantown, West Virginia 26506, United States*

*<sup>2</sup> Department of Mechanical and Aerospace Engineering, West Virginia University, Morgantown, West Virginia 26506, United States*

### **Detailed fabrication procedures for SCNT cathode materials**

First, Multi-walled carbon nanotubes (CNTs, 10~50 nm in diameter and 5~9  $\mu\text{m}$  in length, Sigma-Aldrich, St. Louis, MO) were soaked in nitric acid (70 wt.%) and sulfuric acid (98 wt.%) (v 1:3) in an ultrasonic container for 1 h, kept in an oven of 70  $^{\circ}\text{C}$  for 2 h, and then rinsed with distilled water to obtain the treated CNTs.

Second, elemental sulfur was dissolved into carbon disulfide solution ( $\text{CS}_2$ , Sigma-Aldrich) for 1 h to reach saturation. Meanwhile, the treated CNTs in the first step were immersed in hydrogen peroxide ( $\text{H}_2\text{O}_2$ , Sigma-Aldrich) solution for 1 h to obtain the functionalized CNTs.

Third, the prepared sulfur in  $\text{CS}_2$  suspension were added dropwise to the CNTs in  $\text{H}_2\text{O}_2$  solution (with  $\text{pH}=7$ , adjusted by  $\text{LiOH}$ ) at a slow rate of 2 ml per minute. Next, the mixture was stirred under magnetic at 50  $^{\circ}\text{C}$  in a sealed glass box for 2 h. Then, the solution was evaporated at 50  $^{\circ}\text{C}$  in a fume hood for 1.5 h to obtain the pristine SCNTs.

Last, the samples were treated in a vacuum oven at 159  $^{\circ}\text{C}$  for 2 h followed at 300  $^{\circ}\text{C}$  for 5 h, and designated as SCNT-300. Two types of control samples were prepared: (i) SCNT-159, obtained by heating the pristine SCNTs in a vacuum oven at 159  $^{\circ}\text{C}$  for 10 h; (ii) S/CNT-159, fabricated by mixing sulfur and functionalized CNTs together and heating the mixture in a vacuum oven at 159  $^{\circ}\text{C}$  for 10 h.

## Figures and Tables

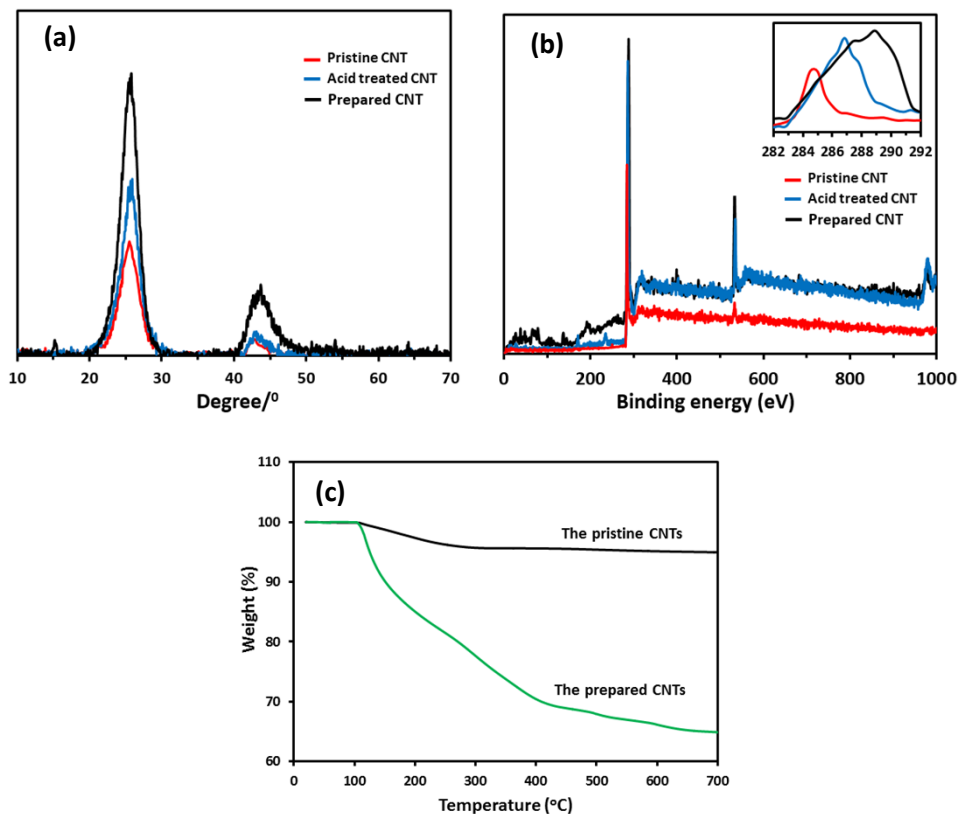

**Figure S1.** Characterization of the pristine and prepared CNTs. (a) XRD pattern and (b) XPS analysis of three kinds of CNT: pristine CNTs, CNTs treated with two mixed concentrated acids (i.e., nitric acid and sulfuric acid), and CNTs treated with the two mixed concentrated acids followed with  $\text{H}_2\text{O}_2$  treatment. The intensities of both carbon peaks and oxygen peaks in Figure S1b increased with the mixed acids and  $\text{H}_2\text{O}_2$  treatments. Compared to the non-treated CNTs, the C1s peak exhibited both a shift and an asymmetric broadening to higher binding energies (Figure S1b inset). The tip-shift of this peak, due to the polar character of the carbon oxygen bonds, was an evidence of the incorporation of oxygen into the nanotube structure. A contribution at about 288.4 eV described surface oxygen groups with multiple carbon oxygen bonds. (c) TGA profiles of the pristine and prepared CNTs.

The oxygen and corresponding -COOH contents in the CNTs were calculated in **Tables S1** and **S2**, respectively. The oxygen content in the CNTs significantly increased from 1.1 wt.% of pristine CNT to 10.4 wt.% and 19.7 wt.% respectively, after being treated with the mixed concentrated nitric and sulfuric acids or treated with the two mixed concentrated acids followed with H<sub>2</sub>O<sub>2</sub> treatment.

| Sample                                                         | Peak | Center | Wt.% | Stoichiometric amount |
|----------------------------------------------------------------|------|--------|------|-----------------------|
| Pristine CNT                                                   | C1s  | 284.5  | 98.5 | 1.00                  |
|                                                                | O1s  | 531.4  | 1.5  | 0.01                  |
| CNT treated with mixed acids                                   | C1s  | 286.4  | 89.6 | 1.00                  |
|                                                                | O1s  | 530.9  | 10.4 | 0.09                  |
| CNT treated with mixed acids and H <sub>2</sub> O <sub>2</sub> | C1s  | 288.4  | 80.3 | 1.00                  |
|                                                                | O1s  | 530.4  | 19.7 | 0.18                  |

**Table S1.** Surface element contents of CNTs with different treatment methods.

| Sample                                                         | O stoichiometric amount (%) | -COOH stoichiometric amount (%) | -COOH weight (wt.%) |
|----------------------------------------------------------------|-----------------------------|---------------------------------|---------------------|
| Pristine CNT                                                   | 1.1                         | 0.55                            | 4.2                 |
| CNT treated with mixed acids                                   | 8.7                         | 4.35                            | 12.2                |
| CNT treated with mixed acids and H <sub>2</sub> O <sub>2</sub> | 18.4                        | 9.2                             | 25.9                |

**Table S2.** Relationship between O content and -COOH content on the surface of CNTs.

| Sample   | Weight loss (wt.%) | CNT content (wt.%) | -COOH content (wt.%) | Sulfur content (wt.%) |
|----------|--------------------|--------------------|----------------------|-----------------------|
| FCNT     | 36.2               | 63.8               | 36.2                 | 0                     |
| SCNT-159 | 90.3               | 9.7                | 5.5                  | 84.8                  |
| SCNT-300 | 79.6               | 20.4               | 11.6                 | 68                    |

**Table S3.** Sulfur contents in SCNT-159 and SCNT-300.

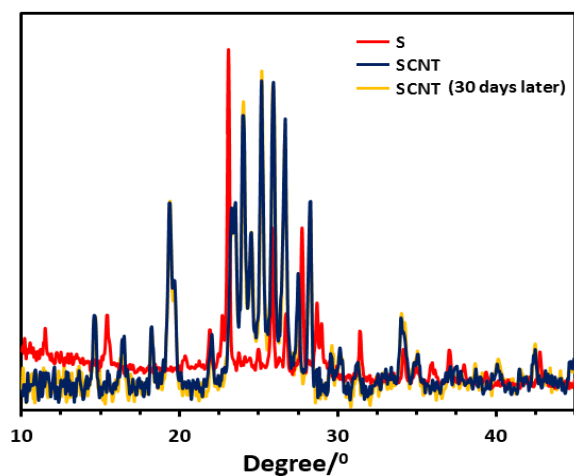

**Figure S2.** XRD pattern of SCNT-300. The majority of sulfur in SCNT-300 adopted the uncommon monoclinic phase rather than the typical orthorhombic phase (sulfur), and the monoclinic sulfur was very stable even after stored for 30 days at room temperature.

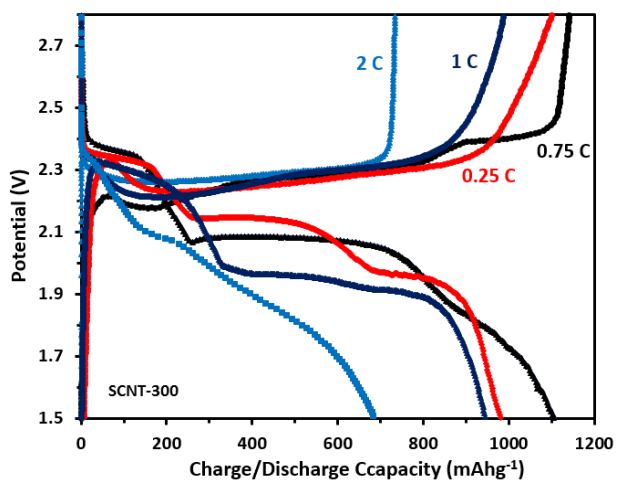

**Figure S3.** Voltage profiles of SCNT-300 cathodes at different current rates.

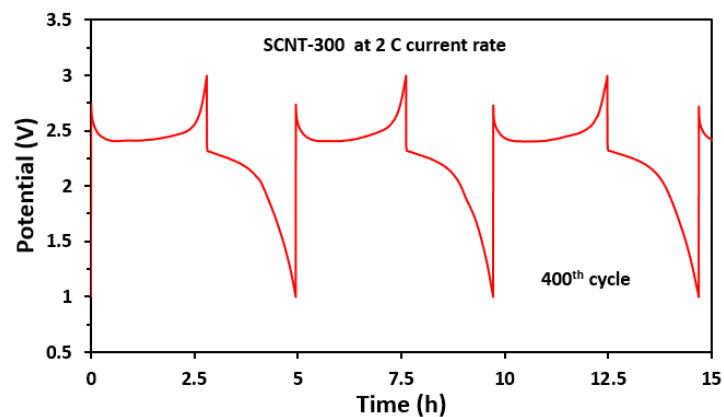

**Figure S4.** Voltage profiles (400<sup>th</sup> cycle) of SCNT-300 cathodes at 2 C.

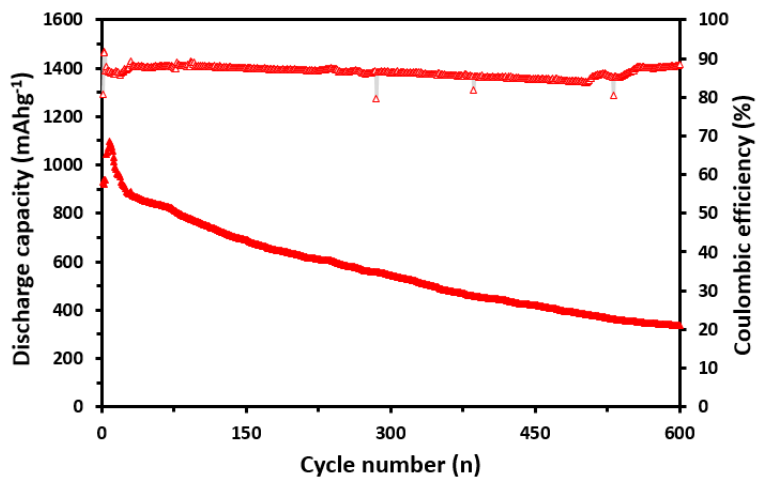

**Figure S5.** Cycling properties of Li-S cells comprised of SCNT-159 cathodes, which contained 10 wt.% of PVDF and 90 wt.% SCNT-159 material; Capacities were normalized by the mass of sulfur. The current rate for discharge/charge was 0.75 C. Sulfur load was 3.07 mg cm<sup>-2</sup> in the cathode.

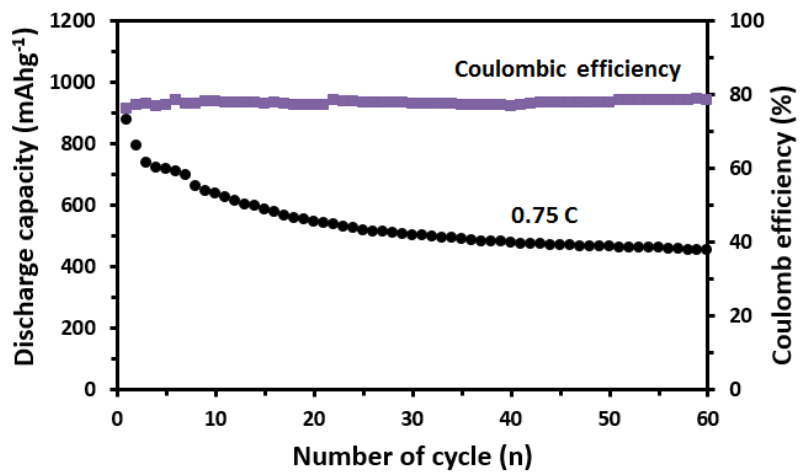

**Figure S6.** Cycling properties of Li-S cells comprised of S/CNT-159 (mixing sulfur and functionalized CNTs) cathodes, which contained 10 wt.% of PVDF and 90 wt.% S/CNT-159 material; Capacities were normalized by the mass of sulfur. The current rate for discharge/charge is 0.75 C. Sulfur load was 3.01 mg cm<sup>-2</sup> in the cathode.
